# Supplementary material for: New Challenges in Tumor Mutation Heterogeneity in Advanced Ovarian Cancer by a Targeted Next-Generation Sequencing (NGS) Approach
Source: MDPI journal article supplement (doi:10.3390/cells8060584), 2019-06-14
Supplement: s1 [file s1]

**Table S2.** Associations between number of somatic mutations in *TP53* gene and outcomes in patients with advanced ovarian cancer (All, n=79), including HGSOCs (HGSOC, n=64).

|                        |                             | Median survival |               | Univariate      |                     |                       | Multivariate <sup>a</sup> |                     |                       |
|------------------------|-----------------------------|-----------------|---------------|-----------------|---------------------|-----------------------|---------------------------|---------------------|-----------------------|
|                        |                             | n. of patients  | time (months) | HR <sup>*</sup> | 95% CI <sup>*</sup> | <i>p</i> <sup>*</sup> | HR <sup>*</sup>           | 95% CI <sup>*</sup> | <i>p</i> <sup>*</sup> |
| <b>All (n=79)</b>      |                             |                 |               |                 |                     |                       |                           |                     |                       |
| <b>PFI<sup>a</sup></b> |                             |                 |               |                 |                     |                       |                           |                     |                       |
|                        | N. of <i>TP53</i> mutations |                 |               |                 |                     |                       |                           |                     |                       |
| 0                      |                             | 21              | 22.1          | Ref.            | -                   | -                     | Ref.                      | -                   | -                     |
| ≥1                     |                             | 56              | 8.2           | 1.53            | 0.89-2.65           | 0.125                 | 1.70                      | 0.91-3.21           | 0.098                 |
| <b>TTR<sup>a</sup></b> |                             |                 |               |                 |                     |                       |                           |                     |                       |
|                        | N. of <i>TP53</i> mutations |                 |               |                 |                     |                       |                           |                     |                       |
| 0                      |                             | 21              | 28.2          | Ref.            | -                   | -                     | Ref.                      | -                   | -                     |
| ≥1                     |                             | 56              | 13.8          | 1.50            | 0.85-2.63           | 0.160                 | 1.65                      | 0.86-3.15           | 0.128                 |
| <b>OS</b>              |                             |                 |               |                 |                     |                       |                           |                     |                       |
|                        | N. of <i>TP53</i> mutations |                 |               |                 |                     |                       |                           |                     |                       |
| 0                      |                             | 22              | 68.3          | Ref.            | -                   | -                     | Ref.                      | -                   | -                     |
| ≥1                     |                             | 57              | 44.0          | 1.58            | 0.81-3.08           | 0.180                 | 1.65                      | 0.76-3.54           | 0.203                 |
| <b>HGSOC (n=64)</b>    |                             |                 |               |                 |                     |                       |                           |                     |                       |
| <b>PFI<sup>b</sup></b> |                             |                 |               |                 |                     |                       |                           |                     |                       |
|                        | N. of <i>TP53</i> mutations |                 |               |                 |                     |                       |                           |                     |                       |
| 0                      |                             | 15              | 15.7          | Ref.            | -                   | -                     | Ref.                      | -                   | -                     |
| ≥1                     |                             | 48              | 8.2           | 1.23            | 0.68-2.24           | 0.495                 | 1.46                      | 0.74-2.89           | 0.277                 |
| <b>TTR<sup>b</sup></b> |                             |                 |               |                 |                     |                       |                           |                     |                       |
|                        | N. of <i>TP53</i> mutations |                 |               |                 |                     |                       |                           |                     |                       |
| 0                      |                             | 15              | 20.3          | Ref.            | -                   | -                     | Ref.                      | -                   | -                     |
| ≥1                     |                             | 48              | 13.8          | 1.17            | 0.62-2.20           | 0.619                 | 1.37                      | 0.67-2.79           | 0.391                 |
| <b>OS</b>              |                             |                 |               |                 |                     |                       |                           |                     |                       |
|                        | N. of <i>TP53</i> mutations |                 |               |                 |                     |                       |                           |                     |                       |
| 0                      |                             | 15              | 71.1          | Ref.            | -                   | -                     | Ref.                      | -                   | -                     |
| ≥1                     |                             | 49              | 45.1          | 1.41            | 0.59-3.35           | 0.435                 | 1.60                      | 0.65-3.94           | 0.303                 |

<sup>a</sup>Estimated through Cox proportional hazard model; <sup>\*</sup>Adjusted for residual tumor after PDS, FIGO stage and age at diagnosis. <sup>a</sup>Two patients were not evaluated due to loss at follow up. <sup>b</sup>One patient was not evaluated due to loss of follow-up. Ref.: Reference Category; PFI: platinum free interval; TTR: time to recurrence; OS: overall survival.
