# Supplementary material for: New Challenges in Tumor Mutation Heterogeneity in Advanced Ovarian Cancer by a Targeted Next-Generation Sequencing (NGS) Approach
Source: Cells. 2019 Jun 14;8(6):584. doi: 10.3390/cells8060584 (PMC6627128; doi:10.3390/cells8060584)
Supplement: Supplementary file 1 [file cells-08-00584-s001.zip › Table S1-1.xlsx]

## Sheet: Foglio1
Supplementary Table S1. Somatic gene alterations in 79 cases of advanced ovarian cancer.
Patient	Tumor_Histotype	Gene	Position	Ref_seq	Alt_seq	VAF (%)	Type_of_ alteration	NM_number	Exon	cDNA_change	AA_change	IARC_TP53_Mutation_ID	MutationTaster	HSF	SIFT	Polyphen-2	Provean	Cosmic_ID	dbSNP_ID	ClinVar_ID (Clinical significance)
#31	Non-HGSOC_Unclassified	TP53	Chr17:7578265	T	C	28.59	Missense	NM_000546	6	c.584T>C	p.Ile195Thr	2446	Disease-causing	Probably no impact on splicing	Damaging	Probably damaging	Deleterious	COSM11089	rs760043106	376620 (VUS)
#62	HGSOC	TP53	Chr17:7578190	A	G	17.17	Missense	NM_000546	6	c.659A>G	p.Tyr220Cys	2821	Disease-causing	Potential alteration on splicing	Damaging	Probably damaging	Deleterious	COSM10758	rs121912666	127819 (Pathogenic)
#81	HGSOC	TP53	Chr17:7577142	G	A	86.88	Missense	NM_000546	8	c.796G>A	p.Gly266Arg	3615	Disease-causing	Potential alteration on splicing	Damaging	Probably damaging	Deleterious	COSM10794	rs1057519990	458566 (VUS)
#87	Non-HGSOC_Unclassified	TP53	Chr17:7578454	C	A	11.17	Missense	NM_000546	5	c.476C>A	p.Ala159Asp	1879	Disease-causing	Probably no impact on splicing	Damaging	Probably damaging	Deleterious	COSM11496	NA	NA
#90	HGSOC	TP53	Chr17:7577082	G	A	7.74	Missense	NM_000546	8	c.856G>A	p.Glu286Lys	3948	Disease-causing	Potential alteration on splicing	Damaging	Probably damaging	Deleterious	COSM10726	rs1057519985	183752 (Pathogenic/Likely pathogenic)
#145	HGSOC	TP53	Chr17:7577534	G	T	56.51	Missense	NM_000546	7	c.747G>T	p.Arg249Ser	3327	Disease-causing	Potential alteration on splicing	Damaging	Probably damaging	Deleterious	COSM10785	rs28934571	406598 (VUS)
#152	HGSOC	TP53	Chr17:7577120	G	A	30.85	Missense	NM_000546	8	c.818G>A	p.Arg273His*	3737	Disease-causing	Probably no impact on splicing	Damaging	Possibly damaging	Deleterious	COSM10660	rs28934576	12366 (Pathogenic/Likely pathogenic)
#153	HGSOC	TP53	Chr17:7577121	C	T	7.91	Missense	NM_000546	8	c.817C>T	p.Arg273Cys*	3730	Disease-causing	Potential alteration on splicing	Damaging	Probably damaging	Deleterious	COSM10659	rs121913343	43594 (Conflicting interpretations of pathogenicity)
#157	HGSOC	TP53	Chr17:7577120	G	T	7.87	Missense	NM_000546	8	c.818G>T	p.Arg273Leu*	3739	Disease-causing	Potential alteration on splicing	Damaging	Probably damaging	Deleterious	COSM10779	rs28934576	376655 (Pathogenic)
#159	HGSOC	TP53	Chr17:7576870	AGAAACCACTGGATGGA		8.59	INDEL	NM_000546	9	c.959_975delAGAAACCACTGGATGGA	p.Lys320Argfs*11	NA	Disease-causing	Potential alteration on splicing	NA	NA	NA	NA	NA	NA
#171	HGSOC	TP53	Chr17:7577018	G	A	32.35	Splice site	NM_000546	Intron8	c.919+1G>A		5161	Disease-causing	Alteration of the WT donor site, most probably affecting splicing	NA	NA	NA	COSM44143	NA	NA
#177	HGSOC	TP53	Chr17: 7577549	G	G	85.7	INDEL	NM_000546	7	c.731insG	p.Gly245Rfs*19	6016	Disease-causing	Potential alteration on splicing	NA	NA	NA	NA	NA	NA
#240	HGSOC	TP53	Chr17: 7578407	C	G	64.56	Missense	NM_000546	5	c.523C>G	p.Arg175Gly*	2139	Disease-causing	Potential alteration on splicing	Damaging	Probably damaging	Deleterious	COSM10870	rs138729528	376649 (Pathogenic/Likely pathogenic)
#243	Non-HGSOC_Mixed	TP53	Chr17: 7578226	GA	AT	68.24	Missense	NM_000546	6	c.622_623GA>AT	p.Asp208Ile	5615	Disease-causing	Potential alteration on splicing	Damaging	Probably damaging	Deleterious	COSM44893	NA	NA
#243	Non-HGSOC_Mixed	TP53	Chr17: 7578226	A	T	4.65	Missense	NM_000546	6	c.623A>T	p.Asp208Val	2631	Disease-causing	Potential alteration on splicing	Damaging	Probably damaging	Deleterious	COSM44249	NA	NA
#243	Non-HGSOC_Mixed	TP53	Chr17: 7578227	G	A	5.21	Missense	NM_000546	6	c.622G>A	p.Asp208Asn	2624	Disease-causing	Potential alteration on splicing	Damaging	Possibly damaging	Deleterious	COSM43987	NA	NA
#244	Non-HGSOC_Endometrioid	TP53	Chr17: 7578190	A	G	70.32	Missense	NM_000546	6	c.659A>G	p.Tyr220Cys	2821	Disease-causing	Potential alteration on splicing	Damaging	Probably damaging	Deleterious	COSM10758	rs121912666	127819 (Pathogenic)
#259	HGSOC	TP53	Chr17: 7579311	G	T	72.04	Splice site	NM_000546	Intron4	c.375+1G>T		5723	Disease-causing	Alteration of the WT donor site, most probably affecting splicing	NA	NA	NA	COSM127204	NA	NA
#275	HGSOC	TP53	Chr17: 7577538	G	A	96.21	Missense	NM_000546	7	c.743G>A	p.Arg248Gln*	3297	Disease-causing	Potential alteration on splicing	Damaging	Probably damaging	Deleterious	COSM10662	rs11540652	12356(Pathogenic/Likely pathogenic)
#290	Non-HGSOC_Mixed	TP53	Chr17: 7577121	C	T	75.36	Missense	NM_000546	8	c.817C>T	p.Arg273Cys*	3730	Disease-causing	Potential alteration on splicing	Damaging	Probably damaging	Deleterious	COSM10659	rs121913343	43594 (Conflicting interpretations of pathogenicity)
#295	HGSOC	TP53	Chr17: 7577079	G	T	74.36	Nonsense	NM_000546	8	c.859G>T	p.Glu287*	3965	Disease-causing	Potential alteration on splicing	NA	NA	NA	COSM214243	NA	NA
#300	Non-HGSOC_Undiffrentiated	TP53	Chr17: 7579329	A	G	27.32	Missense	NM_000546	4	c.358A>G	p.Lys120Glu	1245	Disease-causing	Potential alteration on splicing	Damaging	Probably damaging	Deleterious	COSM1522473	rs121912658	141098 (Conflicting interpretations of pathogenicity)
#305	HGSOC	TP53	Chr17: 7577541	TGGGCGGCATGA		58.43	INDEL	NM_000546	7	c.728_739delTGGGCGGCATGA	p.Met243_Met247del	NA	Disease-causing	Potential alteration on splicing	NA	NA	NA	NA	NA	NA
#328	HGSOC	TP53	Chr17: 7579310	T	A	13.59	Splice site	NM_000546	Intron4	c.375+2T>A		5130	Disease-causing	Alteration of the WT donor site, most probably affecting splicing	NA	NA	NA	COSM46397	NA	528256 (Likely pathogenic)
#333	HGSOC	TP53	Chr17: 7577517	T	C	27.09	Missense	NM_000546	7	c.764T>C	p.Ile255Thr	3439	Disease-causing	Probably no impact on splicing	Damaging	Probably damaging	Deleterious	COSM10788	rs876659675	376623 (VUS)
#336	HGSOC	TP53	Chr17: 7577539	C	G	96.77	Missense	NM_000546	7	c.742C>G	p.Arg248Gly*	3729	Disease-causing	Potential alteration on splicing	Damaging	Possibly damaging	Deleterious	COSM11564	rs121912651	NA
#337	HGSOC	TP53	Chr17: 7574002	C		16.07	INDEL	NM_000546	10	c.1024_1024delC	p.Arg342Glufs*3	NA	Disease-causing	Potential alteration on splicing	NA	NA	NA	COSM128665	NA	NA
#346	HGSOC	TP53	Chr17:7579517	CAATGGTTCACTGAAG		22.03	INDEL	NM_000546	4	c.154_169delCAATGGTTCACTGAAG	p.Gln52Thrfs*66	NA	Disease-causing	Potential alteration on splicing	NA	NA	NA	NA	NA	NA
#347	HGSOC	TP53	Chr17: 7577025	T	T	59.21	Nonsense	NM_000546	8	c.912insT	p.Lys305*	NA	Disease-causing	Potential alteration on splicing	NA	NA	NA	NA	NA	NA
#349	HGSOC	TP53	Chr17: 7578290	G	A	41.93	Splice site	NM_000546	Intron5	c.560-1G>A		5143	Disease-causing	Alteration of the WT acceptor site, most probably affecting splicing	NA	NA	NA	COSM127200	NA	NA
#349	HGSOC	TP53	Chr17: 7579583	T	C	4.57	Missense	NM_000546	4	c.104T>C	p.Leu35Ser	NA	Polymorphism	Probably no impact on splicing	Tolerated	Benign	Neutral	NA	NA	NA
#353	HGSOC	TP53	Chr17: 7579358	G	C	68.65	Missense	NM_000546	4	c.329G>C	p.Arg110Pro*	1133	Polymorphism	Probably no impact on splicing	Damaging	Possibly damaging	Neutral	COSM11250	rs11540654	233627 (Pathogenic/Likely pathogenic)
#354	HGSOC	TP53	Chr17: 7578275	C	T	92.82	Nonsense	NM_000546	6	c.574C>T	p.Gln192*	2394	Disease-causing	Potential alteration on splicing	NA	NA	NA	COSM10733	rs866380588	406579 (Pathogenic)
#359	HGSOC	TP53	Chr17: 7576854	C		25.61	INDEL	NM_000546	9	c.991_991delC	p.Gln331Argfs*14	NA	Disease-causing	Alteration of the WT donor site, most probably affecting splicing	NA	NA	NA	NA	NA	NA
#387	Non-HGSOC_Endometrioid	TP53	Chr17: 7577538	G	A	13.13	Missense	NM_000546	7	c.743G>A	p.Arg248Gln*	3297	Disease-causing	Potential alteration on splicing	Damaging	Probably damaging	Deleterious	COSM10662	rs11540652	12356(Pathogenic/Likely pathogenic)
#396	HGSOC	TP53	Chr17: 7578290	G	A	13.84	Splice site	NM_000546	Intron5	c.560-1G>A		5143	Disease-causing	Alteration of the WT acceptor site, most probably affecting splicing	NA	NA	NA	COSM127200	NA	NA
#403	HGSOC	TP53	Chr17: 7578406	G	A	60.26	Missense	NM_000546	5	c.524G>A	p.Arg175His*	2143	Disease-causing	Potential alteration on splicing	Damaging	Possibly damaging	Deleterious	COSM10648	rs28934578	12374 (Pathogenic)
#406	HGSOC	TP53	Chr17: 7579307	G	A	53.28	Splice site	NM_000546	Intron4	c.375+5G>A		5840	Disease-causing	Alteration of the WT donor site, most probably affecting splicing	NA	NA	NA	COSM6222490	NA	481015 (VUS)
#410	HGSOC	TP53	Chr17: 7578191	T	C	90.2	Missense	NM_000546	6	c.658T>C	p.Tyr220His	2818	Disease-causing	Potential alteration on splicing	Damaging	Probably damaging	Deleterious	COSM1172476	rs530941076	376687 (VUS)
#433	HGSOC	TP53	Chr17: 7577539	C	T	52.3	Missense	NM_000546	7	c.742C>T	p.Arg248Trp*	3294	Disease-causing	Potential alteration on splicing	Damaging	Probably damaging	Deleterious	COSM10656	rs121912651	12347 (Pathogenic)
#456	HGSOC	TP53	Chr17: 7578535	A	G	86.16	Missense	NM_000546	5	c.395A>G	p.Lys132Arg	1413	Disease-causing	Potential alteration on splicing	Damaging	Probably damaging	Deleterious	COSM11582	rs1057519996	376625 (VUS)
#469	HGSOC	TP53	Chr17:7577120	G	A	31.12	Missense	NM_000546	8	c.818G>A	p.Arg273His*	3737	Disease-causing	Potential alteration on splicing	Damaging	Possibly damaging	Deleterious	COSM10660	rs28934576	12366 (Pathogenic/Likely pathogenic)
#478	HGSOC	TP53	Chr17: 7577082	G	T	56.55	Nonsense	NM_000546	8	c.856G>T	p.Glu286*	3950	Disease-causing	Potential alteration on splicing	NA	NA	NA	COSM318163	NA	NA
#512	HGSOC	TP53	Chr17:7577534	G	T	36.17	Missense	NM_000546	7	c.747G>T	p.Arg249Ser	3327	Disease-causing	Potential alteration on splicing	Damaging	Probably damaging	Deleterious	COSM10785	rs28934571	406598 (VUS)
#513	HGSOC	TP53	Chr17:7577094	C	T	20.16	Missense	NM_000546	8	c.844C>T	p.Arg282Trp*	3879	Disease-causing	Potential alteration on splicing	Damaging	Probably damaging	Deleterious	COSM10704	rs28934574	12364 (Conflicting interpretations of pathogenicity)
#519	HGSOC	TP53	Chr17: 7577128	GGGACGGAACAGCTT		47.84	INDEL	NM_000546	8	c.795_809delGGGACGGAACAGCTT	p.Gly266_Phe270del	NA	Disease-causing	Potential alteration on splicing	NA	NA	NA	NA	NA	NA
#535	HGSOC	TP53	Chr17: 7577547	G	C	66.72	Missense	NM_000546	7	c.734G>C	p.Gly245Ala	3245	Disease-causing	Probably no impact on splicing	Damaging	Probably damaging	Deleterious	COSM43965	rs121912656	265357 (Likely pathogenic)
#535	HGSOC	TP53	Chr17: 7577544	A		66.21	Nonsense	NM_000546	7	c.736delA	p.Met246*	NA	Disease-causing	Potential alteration on splicing	NA	NA	NA	COSM44903	NA	NA
#538	HGSOC	TP53	Chr17: 7577114	G	T	58.93	Missense	NM_000546	8	c.824G>T	p.Cys275Phe	3773	Disease-causing	Potential alteration on splicing	Damaging	Probably damaging	Deleterious	COSM10701	rs863224451	376582 (Likely pathogenic)
#544	HGSOC	TP53	Chr17: 7578275	C	T	82.29	Nonsense	NM_000546	6	c.574C>T	p.Gln192*	2394	Disease-causing	Potential alteration on splicing	NA	NA	NA	COSM10733	rs866380588	406579 (Pathogenic)
#545	HGSOC	TP53	Chr17: 7577548	G	A	54.65	Missense	NM_000546	7	c.733G>A	p.Gly245Ser*	3236	Disease-causing	Potential alteration on splicing	Damaging	Probably damaging	Deleterious	COSM6932	rs28934575	12365 (Pathogenic)
#554	HGSOC	TP53	Chr17: 7578403	G	A	6.89	Missense	NM_000546	5	c.527G>A	p.Cys176Tyr	2166	Disease-causing	Potential alteration on splicing	Damaging	Probably damaging	Deleterious	COSM10687	rs786202962	186451 (Conflicting interpretations of pathogenicity)
#567	HGSOC	TP53	Chr17:7577120	G	A	42.76	Missense	NM_000546	8	c.818G>A	p.Arg273His*	3737	Disease-causing	Potential alteration on splicing	Damaging	Possibly damaging	Deleterious	COSM10660	rs28934576	12366 (Pathogenic/Likely pathogenic)
#572	HGSOC	TP53	Chr17:7577104	C		43.64	INDEL	NM_000546	8	c.833delC	p.Pro278Leufs*67	NA	Disease-causing	Potential alteration on splicing	NA	NA	NA	COSM44871	NA	NA
#581	HGSOC	TP53	Chr17:7578431	C	T	46.13	Nonsense	NM_000546	5	c.499C>T	p.Gln167*	2003	Disease-causing	Probably no impact on splicing	NA	NA	NA	COSM11333	NA	NA
#624	HGSOC	TP53	Chr17:7578190	A	G	66.4	Missense	NM_000546	6	c.659A>G	p.Tyr220Cys	2821	Disease-causing	Potential alteration on splicing	Damaging	Probably damaging	Deleterious	COSM10758	rs121912666	127819 (Pathogenic)
#625	HGSOC	TP53	Chr17:7579420	C	T	71.67	Synonymous	NM_000546	4	c.267C>T	p.Pro89Pro	899	Polymorphism	Potential alteration on splicing	Tolerated	NA	Neutral	NA	NA	NA
#625	HGSOC	TP53	Chr17: 7579416	C		71.17	INDEL	NM_000546	4	c.270delC	p.Trp91Glyfs*32	NA	Disease-causing	Potential alteration on splicing	NA	NA	NA	COSM5547698	NA	NA
#629	Non-HGSOC_Mucinous	TP53	Chr17: 7578403	G	T	92.7	Missense	NM_000546	5	c.527G>T	p.Cys176Phe	2168	Disease-causing	Potential alteration on splicing	Damaging	Probably damaging	Deleterious	COSM10645	rs786202962	376569 (Likely pathogenic)
#630	HGSOC	TP53	Chr17: 7577595	T		93.07	INDEL	NM_000546	7	c.685delT	p.Cys229Valfs*18	NA	Disease-causing	Potential alteration on splicing	NA	NA	NA	COSM6917903	NA	NA
#631	HGSOC	TP53	Chr17: 7577097	G	C	12.43	Missense	NM_000546	8	c.841G>C	p.Asp281His	3857	Disease-causing	Potential alteration on splicing	Damaging	Probably damaging	Deleterious	COSM10943	NA	NA
#749	HGSOC	TP53	Chr17: 7577524	A	C	48.13	Missense	NM_000546	7	c.757A>C	p.Thr253Pro	3403	Disease-causing	Potential alteration on splicing	Damaging	Probably damaging	Deleterious	COSM45980	NA	NA
#274	HGSOC	KRAS	Chr12: 25398284	G	A	43.02	Missense	NM_033360	1	c.35G>A	p.Gly12Asp	/	Disease-causing	Potential alteration on splicing	Damaging	Possibly damaging	Deleterious	COSM1135366	rs121913529	12582 (Pathogenic)
#289	Non-HGSOC_Clear_Cell	KRAS	Chr12: 25398284	G	T	83.74	Missense	NM_033360	1	c.35G>T	p.Gly12Val	/	Disease-causing	Potential alteration on splicing	Damaging	Probably damaging	Deleterious	COSM1140133	rs121913529	12583 (Pathogenic)
#343	HGSOC	KRAS	Chr12: 25398284	G	A	6.12	Missense	NM_033360	1	c.35G>A	p.Gly12Asp	/	Disease-causing	Potential alteration on splicing	Damaging	Possibly damaging	Deleterious	COSM1135366	rs121913529	12582 (Pathogenic)
#398	Non-HGSOC_Endometrioid	KRAS	Chr12: 25378669	C	A	4.49	Missense	NM_033360	3	c.329C>A	p.Pro110His	/	Disease-causing	Potential alteration on splicing	Damaging	Probably damaging	Deleterious	NA	NA	NA
#401	HGSOC	KRAS	Chr12: 25398284	G	A	7.22	Missense	NM_033360	1	c.35G>A	p.Gly12Asp	/	Disease-causing	Potential alteration on splicing	Damaging	Possibly damaging	Deleterious	COSM1135366	rs121913529	12582 (Pathogenic)
#406	HGSOC	KRAS	Chr12: 25398285	G	T	51.91	Missense	NM_033360	1	c.34G>T	p.Gly12Cys	/	Disease-causing	Potential alteration on splicing	Damaging	Probably damaging	Deleterious	COSM1140136	rs121913530	12578 (Pathogenic/Likely pathogenic)
#622	Non-HGSOC_Mixed	KRAS	Chr12: 25398284	G	A	18.38	Missense	NM_033360	1	c.35G>A	p.Gly12Asp	/	Disease-causing	Potential alteration on splicing	Damaging	Possibly damaging	Deleterious	COSM1135366	rs121913529	12582 (Pathogenic)
#87	Non-HGSOC_Unclassified	FBXW7	Chr4:153250860	C	T	67.07	Synonymous	NM_033632	7	c.1200C>T	p.Asp400Asp	/	Disease-causing	Potential alteration on splicing	Tolerated	NA	Neutral	COSM51401	rs144306993	NA
#145	HGSOC	FBXW7	Chr4: 153250883	C	T	4.26	Nonsense	NM_033632	7	c.1177C>T	p.Arg393*	/	Disease-causing	Probably no impact on splicing	NA	NA	NA	COSM1052102	NA	NA
#274	HGSOC	FBXW7	Chr4: 153250833	C	T	4.13	Synonymous	NM_033632	7	c.1227C>T	p.Val409Val	/	Disease-causing	No impact on splicing	Tolerated	NA	Neutral	NA	NA	NA
#243	Non-HGSOC_Mixed	PTEN	Chr10: 89653805	A	G	69.41	Missense	NM_000314	2	c.103A>G	p.Met35Val	/	Disease-causing	Potential alteration on splicing	Damaging	Probably damaging	Deleterious	COSM5053	rs876659443	231916 (Likely pathogenic)
#343	HGSOC	PTEN	Chr10: 89717672	C	T	10.6	Nonsense	NM_000314	7	c.697C>T	p.Arg233*	/	Disease-causing	Potential alteration on splicing	NA	NA	NA	COSM5154	rs121909219	7813 (Pathogenic)
#538	HGSOC	PTEN	Chr10: 89717650	TCCTCCA		16.6	INDEL	NM_000314	7	c.676_682delTCCTCCA	p.Ser226Ilefs*28	/	Disease-causing	Potential alteration on splicing	NA	NA	NA	NA	NA	NA
#359	HGSOC	PIK3CA	Chr3: 178952085	A	T	8.3	Missense	NM_006218	21	c.3140A>T	p.His1047Leu	/	Disease-causing	Potential alteration on splicing	Tolerated	Benign	Neutral	COSM94987	rs121913279	13653 (Pathogenic)
#387	Non-HGSOC_Endometrioid	PIK3CA	Chr3: 178916890	C	T	11.08	Missense	NM_006218	1	c.277C>T	p.Arg93Trp	/	Disease-causing	Potential alteration on splicing	Damaging	Possibly damaging	Deleterious	COSM1041455	NA	NA
#622	Non-HGSOC_Mixed	PIK3CA	Chr3: 178952085	A	G	9.34	Missense	NM_006218	21	c.3140A>G	p.His1047Arg	/	Disease-causing	Potential alteration on splicing	Damaging	Possibly damaging	Neutral	COSM775	rs121913279	13652 (Pathogenic)
#275	HGSOC	APC	Chr5: 112175599	T	AA	28.19	INDEL	NM_000038	16	c.4308_4309insAA	p.Thr1438Lysfs*36	/	Disease-causing	No impact on splicing	NA	NA	NA	NA	NA	NA
#307	Non-HGSOC_Endometrioid	GNAS	Chr20: 57480490	G	A	4.03	Missense	NM_080425	6	c.2414G>A	p.Cys805Tyr	/	Disease-causing	No impact on splicing	Damaging	Probably damaging	Deleterious	NA	NA	NA
#629	Non-HGSOC_Mucinous	BRAF	Chr7: 140453136	T	A	49.52	Missense	NM_004333	15	c.1799T>A	p.Val600Glu	/	Disease-causing	Potential alteration on splicing	Damaging	Probably damaging	Deleterious	COSM476	rs113488022	13961(Pathogenic)
*single-base variants in TP53 localized at CpG sites. VAF: variant allele frequency; INDEL: insertion or deletion leading to in-frame or frameshift change; HGSOC: high-grade serous ovarian cancer; NA: not available; VUS: variant with uncertain significance; HSF: human splice finder.
